# Supplementary material for: Identification and Validation of Candidate Genes Involved in Fatty Acid Content in Oil Palm by Genome-Wide Association Analysis
Source: Front Plant Sci. 2019 Oct 15;10:1263. doi: 10.3389/fpls.2019.01263 (PMC6804545; doi:10.3389/fpls.2019.01263)
Supplement: Supplementary file 2 [file Table_2.xlsx]

## Sheet: Sheet1
Supplementary Table 2 Population structure and Q value of 200 oil palm individuals
Individuals	Q1	Q2	Q3	Q4
Cri-1	0.000010 0.897134 0.102836 0.000010 0.000010
Cri-2	0.457164 0.000010 0.464352 0.000010 0.078465
Cri-3	0.274870 0.000010 0.000010 0.075279 0.649832
Cri-4	0.000010 0.999960 0.000010 0.000010 0.000010
Cri-5	0.000010 0.897328 0.102642 0.000010 0.000010
Cri-6	0.000010 0.999960 0.000010 0.000010 0.000010
Cri-7	0.000010 0.800063 0.102708 0.010601 0.086618
Cri-8	0.000010 0.689498 0.098942 0.007180 0.204369
Cri-9	0.054533 0.000010 0.000010 0.487361 0.458086
Cri-10	0.000010 0.096342 0.000010 0.000010 0.903628
Cri-11	0.000010 0.105973 0.311267 0.000010 0.582739
Cri-12	0.036581 0.000010 0.037800 0.000010 0.925599
Cri-13	0.999960 0.000010 0.000010 0.000010 0.000010
Cri-14	0.090662 0.062301 0.000010 0.640508 0.206519
Cri-15	0.042658 0.194643 0.000010 0.128425 0.634264
Cri-16	0.061487 0.000015 0.082908 0.000010 0.855579
Cri-17	0.000010 0.367778 0.242221 0.000010 0.389981
Cri-18	0.101011 0.000010 0.000010 0.000010 0.898959
Cri-19	0.999960 0.000010 0.000010 0.000010 0.000010
Cri-20	0.039226 0.000010 0.000010 0.037385 0.923369
Cri-21	0.999960 0.000010 0.000010 0.000010 0.000010
Cri-22	0.018040 0.304185 0.257793 0.000010 0.419972
Cri-23	0.106239 0.025174 0.000010 0.655693 0.212883
Cri-24	0.000010 0.972397 0.015931 0.000010 0.011652
Cri-25	0.019931 0.053215 0.827610 0.099234 0.000010
Cri-26	0.000010 0.999960 0.000010 0.000010 0.000010
Cri-27	0.000010 0.917169 0.000010 0.082801 0.000010
Cri-28	0.999960 0.000010 0.000010 0.000010 0.000010
Cri-29	0.000010 0.880725 0.119245 0.000010 0.000010
Cri-30	0.000010 0.706469 0.035910 0.000010 0.257602
Cri-31	0.999960 0.000010 0.000010 0.000010 0.000010
Cri-32	0.000010 0.774438 0.048761 0.000010 0.176781
Cri-33	0.000010 0.926365 0.000010 0.073605 0.000010
Cri-34	0.000010 0.999960 0.000010 0.000010 0.000010
Cri-35	0.000010 0.999960 0.000010 0.000010 0.000010
Cri-36	0.000010 0.956670 0.043300 0.000010 0.000010
Cri-37	0.000010 0.938485 0.038130 0.023365 0.000010
Cri-38	0.061140 0.000010 0.928359 0.010481 0.000010
Cri-39	0.000010 0.915263 0.000010 0.084707 0.000010
Cri-40	0.000010 0.873566 0.048609 0.000010 0.077806
Cri-41	0.000014 0.931677 0.068290 0.000010 0.000010
Cri-42	0.123691 0.000010 0.083601 0.005719 0.786980
Cri-43	0.048848 0.054368 0.000010 0.000156 0.896618
Cri-44	0.005234 0.977307 0.017439 0.000010 0.000010
Cri-45	0.000010 0.999960 0.000010 0.000010 0.000010
Cri-46	0.000010 0.975172 0.024798 0.000010 0.000010
Cri-47	0.018747 0.761796 0.081851 0.000010 0.137597
Cri-48	0.000010 0.989429 0.010541 0.000010 0.000010
Cri-49	0.000010 0.999960 0.000010 0.000010 0.000010
Cri-50	0.000010 0.999960 0.000010 0.000010 0.000010
Cri-51	0.000010 0.651032 0.011543 0.067266 0.270150
Cri-52	0.000010 0.293518 0.276352 0.000010 0.430110
Cri-53	0.000016 0.000010 0.000010 0.999954 0.000010
Cri-54	0.000010 0.764134 0.183047 0.052799 0.000010
Cri-55	0.999959 0.000011 0.000010 0.000010 0.000010
Cri-56	0.000010 0.999960 0.000010 0.000010 0.000010
Cri-57	0.000010 0.717386 0.030525 0.000010 0.252070
Cri-58	0.000010 0.999960 0.000010 0.000010 0.000010
Cri-59	0.000010 0.000010 0.000010 0.999960 0.000010
Cri-60	0.000010 0.999960 0.000010 0.000010 0.000010
Cri-61	0.000010 0.999960 0.000010 0.000010 0.000010
Cri-62	0.055978 0.000010 0.762403 0.164904 0.016706
Cri-63	0.999960 0.000010 0.000010 0.000010 0.000010
Cri-64	0.000010 0.999960 0.000010 0.000010 0.000010
Cri-65	0.000010 0.878747 0.035992 0.000010 0.085241
Cri-66	0.000010 0.939543 0.032633 0.020251 0.007563
Cri-67	0.000010 0.820705 0.094582 0.000010 0.084693
Cri-68	0.999960 0.000010 0.000010 0.000010 0.000010
Cri-69	0.027404 0.972566 0.000010 0.000010 0.000010
Cri-70	0.999960 0.000010 0.000010 0.000010 0.000010
Cri-71	0.280090 0.000010 0.000010 0.077619 0.642272
Cri-72	0.002226 0.875090 0.000010 0.013221 0.109452
Cri-73	0.010382 0.933695 0.034200 0.000010 0.021713
Cri-74	0.000010 0.000010 0.894396 0.000010 0.105574
Cri-75	0.021300 0.960173 0.000010 0.018507 0.000010
Cri-76	0.016697 0.217999 0.000010 0.656025 0.109269
Cri-77	0.060384 0.907037 0.003715 0.000010 0.028854
Cri-78	0.000010 0.994244 0.000010 0.005726 0.000010
Cri-79	0.018085 0.199482 0.279646 0.000010 0.502777
Cri-80	0.000010 0.899858 0.100112 0.000010 0.000010
Cri-81	0.000010 0.764965 0.111526 0.000010 0.123489
Cri-82	0.000010 0.951030 0.000010 0.048940 0.000010
Cri-83	0.000010 0.000010 0.999955 0.000015 0.000010
Cri-84	0.000014 0.745681 0.115162 0.000010 0.139133
Cri-85	0.000010 0.000010 0.154699 0.133114 0.712167
Cri-86	0.173676 0.094328 0.000010 0.085775 0.646211
Cri-87	0.039221 0.106621 0.000010 0.000010 0.854138
Cri-88	0.016210 0.191504 0.000010 0.126316 0.665960
Cri-89	0.999960 0.000010 0.000010 0.000010 0.000010
Cri-90	0.147263 0.000010 0.000010 0.539235 0.313482
Cri-91	0.055323 0.000010 0.000010 0.944647 0.000010
Cri-92	0.000010 0.000010 0.422994 0.556911 0.020075
Cri-93	0.052075 0.000010 0.000010 0.435208 0.512697
Cri-94	0.123185 0.000010 0.000010 0.540387 0.336408
Cri-95	0.999960 0.000010 0.000010 0.000010 0.000010
Cri-96	0.105799 0.123680 0.000010 0.116626 0.653885
Cri-97	0.999960 0.000010 0.000010 0.000010 0.000010
Cri-98	0.000010 0.000010 0.431963 0.568007 0.000010
Cri-99	0.031782 0.000010 0.011879 0.000010 0.956320
Cri-100	0.092259 0.000010 0.000010 0.582133 0.325589
Cri-101	0.999960 0.000010 0.000010 0.000010 0.000010
Cri-102	0.134677 0.119020 0.035704 0.665064 0.045535
Cri-103	0.999960 0.000010 0.000010 0.000010 0.000010
Cri-104	0.000010 0.999960 0.000010 0.000010 0.000010
Cri-105	0.999960 0.000010 0.000010 0.000010 0.000010
Cri-106	0.000010 0.868678 0.081772 0.000010 0.049529
Cri-107	0.132360 0.000010 0.029376 0.321451 0.516803
Cri-108	0.000010 0.000010 0.000010 0.999960 0.000010
Cri-109	0.000010 0.637603 0.118025 0.048649 0.195713
Cri-110	0.055066 0.000015 0.000010 0.407546 0.537362
Cri-111	0.000010 0.999960 0.000010 0.000010 0.000010
Cri-112	0.399160 0.000010 0.056323 0.074158 0.470350
Cri-113	0.000010 0.000010 0.000010 0.999960 0.000010
Cri-114	0.000010 0.000010 0.946443 0.053527 0.000010
Cri-115	0.088845 0.000010 0.069072 0.000010 0.842063
Cri-116	0.000010 0.000010 0.000010 0.863569 0.136401
Cri-117	0.999960 0.000010 0.000010 0.000010 0.000010
Cri-118	0.999960 0.000010 0.000010 0.000010 0.000010
Cri-119	0.000010 0.141103 0.305896 0.000010 0.552981
Cri-120	0.000010 0.000010 0.068978 0.205920 0.725081
Cri-121	0.164395 0.000010 0.000010 0.304414 0.531171
Cri-122	0.021562 0.299575 0.371287 0.000010 0.307566
Cri-123	0.999960 0.000010 0.000010 0.000010 0.000010
Cri-124	0.178841 0.075859 0.011389 0.334218 0.399694
Cri-125	0.053655 0.000010 0.483968 0.432877 0.029491
Cri-126	0.999960 0.000010 0.000010 0.000010 0.000010
Cri-127	0.000010 0.000010 0.120578 0.879392 0.000010
Cri-128	0.000010 0.200425 0.126316 0.000010 0.673239
Cri-129	0.134155 0.000010 0.017890 0.156341 0.691605
Cri-130	0.999960 0.000010 0.000010 0.000010 0.000010
Cri-131	0.000010 0.319071 0.278719 0.000010 0.402190
Cri-132	0.000010 0.090213 0.024220 0.511953 0.373603
Cri-133	0.022742 0.000010 0.000010 0.081123 0.896114
Cri-134	0.276046 0.000010 0.000010 0.000010 0.723924
Cri-135	0.981341 0.018629 0.000010 0.000010 0.000010
Cri-136	0.000010 0.000010 0.000010 0.999960 0.000010
Cri-137	0.000010 0.874470 0.083677 0.041834 0.000010
Cri-138	0.026042 0.000010 0.000010 0.628773 0.345165
Cri-139	0.000010 0.999960 0.000010 0.000010 0.000010
Cri-140	0.069743 0.000010 0.000010 0.000010 0.930227
Cri-141	0.018766 0.000010 0.861044 0.120170 0.000010
Cri-142	0.000010 0.000010 0.999960 0.000010 0.000010
Cri-143	0.000010 0.017969 0.054939 0.091221 0.835861
Cri-144	0.000010 0.175908 0.283511 0.000010 0.540560
Cri-145	0.063251 0.196019 0.027921 0.310819 0.401989
Cri-146	0.000010 0.967103 0.000010 0.032867 0.000010
Cri-147	0.000010 0.999960 0.000010 0.000010 0.000010
Cri-148	0.354191 0.000010 0.000010 0.211406 0.434384
Cri-149	0.000010 0.999960 0.000010 0.000010 0.000010
Cri-150	0.453516 0.005835 0.000010 0.273288 0.267352
Cri-151	0.000010 0.999960 0.000010 0.000010 0.000010
Cri-152	0.000010 0.986098 0.013872 0.000010 0.000010
Cri-153	0.000010 0.999960 0.000010 0.000010 0.000010
Cri-154	0.034570 0.195554 0.000010 0.076949 0.692917
Cri-155	0.000010 0.000010 0.427854 0.572116 0.000010
Cri-156	0.000010 0.157484 0.110878 0.000010 0.731618
Cri-157	0.166804 0.000010 0.025251 0.174448 0.633486
Cri-158	0.001736 0.304988 0.337340 0.000010 0.355926
Cri-159	0.000010 0.000010 0.094815 0.580248 0.324917
Cri-160	0.000010 0.156222 0.294310 0.000010 0.549448
Cri-161	0.219252 0.000010 0.000010 0.000010 0.780718
Cri-162	0.157091 0.036839 0.004506 0.211217 0.590347
Cri-163	0.000010 0.164129 0.311986 0.000010 0.523866
Cri-164	0.039511 0.000010 0.000010 0.724914 0.235555
Cri-165	0.160209 0.000010 0.000010 0.610102 0.229669
Cri-166	0.000010 0.000010 0.000010 0.999960 0.000010
Cri-167	0.210668 0.000010 0.018621 0.070463 0.700238
Cri-168	0.220850 0.000010 0.079919 0.540282 0.158939
Cri-169	0.128348 0.103555 0.485152 0.132641 0.150305
Cri-170	0.008835 0.011447 0.064000 0.000010 0.915707
Cri-171	0.000013 0.167442 0.107004 0.000010 0.725530
Cri-172	0.001894 0.048341 0.413897 0.457516 0.078353
Cri-173	0.999960 0.000010 0.000010 0.000010 0.000010
Cri-174	0.999960 0.000010 0.000010 0.000010 0.000010
Cri-175	0.095001 0.000010 0.022230 0.636049 0.246711
Cri-176	0.702106 0.000010 0.000010 0.017349 0.280525
Cri-177	0.000010 0.689929 0.043814 0.000010 0.266236
Cri-178	0.000010 0.000010 0.000010 0.000010 0.999960
Cri-179	0.000010 0.000010 0.999960 0.000010 0.000010
Cri-180	0.112291 0.000010 0.498957 0.072586 0.316156
Cri-181	0.000010 0.000010 0.999960 0.000010 0.000010
Cri-182	0.000010 0.950557 0.000010 0.016964 0.032459
Cri-183	0.000010 0.999960 0.000010 0.000010 0.000010
Cri-184	0.024213 0.022057 0.000010 0.000010 0.953710
Cri-185	0.000010 0.000544 0.000010 0.000010 0.999426
Cri-186	0.021922 0.127976 0.030621 0.000010 0.819471
Cri-187	0.150073 0.000011 0.015872 0.000010 0.834034
Cri-188	0.049790 0.018754 0.056777 0.028765 0.845914
Cri-189	0.174936 0.000010 0.000010 0.098397 0.726647
Cri-190	0.000010 0.000010 0.999960 0.000010 0.000010
Cri-191	0.000010 0.000010 0.000010 0.000010 0.999960
Cri-192	0.000010 0.000010 0.000010 0.999960 0.000010
Cri-193	0.999956 0.000011 0.000013 0.000010 0.000010
Cri-194	0.038050 0.000010 0.064859 0.000010 0.897071
Cri-195	0.156807 0.000010 0.468698 0.112140 0.262345
Cri-196	0.000010 0.390563 0.284376 0.000010 0.325041
Cri-197	0.046564 0.056518 0.592988 0.303920 0.000010
Cri-198	0.999960 0.000010 0.000010 0.000010 0.000010
Cri-199	0.999960 0.000010 0.000010 0.000010 0.000010
Cri-200	0.999955 0.000015 0.000010 0.000010 0.000010
